# Supplementary material for: Consumer Segmentation of Green Financial Products Based on Sociodemographic Characteristics
Source: MDPI journal article supplement (doi:10.3390/jrfm16020098), 2023-02-06
Supplement: s1 [file s1]

# Questionnaire

**Are you planning to buy Hungarian financial products in the near future?**

- Yes
- No

## **Part 1: Sociodemographic characteristics**

1. What is your gender?

- Female
- Male

2. Where do you live?

- Village
- City
- County seat
- Capital city

3. What is your age?

- 18-24
- 25-31
- 32-38
- 39-45
- Over 45

4. What is your highest level of education?

- Primary school
- Vocational school (OKJ)
- Higher vocational school (with a vocational qualification, not a basic or master's degree)
- I am currently still studying in higher education
- BSC/MSc degree
- Postgraduate qualification

5. What is your current position at work?

- Voluntary
- Student
- Employee
- Manager

- Entrepreneur

6. How much do you earn per month? (The values are net values in HUF.)

- Below 180,000 HUF per month
- 181,000-280,000 HUF per month
- 281,000 - 380,000 HUF per month
- 380,000-480,000 HUF per month
- Over 480,000 HUF per month

7. Do you have financial goals?

- It is not typical for me to formulate financial goals
- In some cases, I formulate financial goals (e.g. buying a car, real estate, etc.)
- I regularly set long and short-term financial goals

8. I gather information on financial topics regularly and from several sources

- It is not typical for me to gather information on financial topics, or if I do, I only gather information from a few sources
- Before making an investment decision, I gather information, preferably from several sources
- I gather information on financial topics on a daily basis, regularly using several sources

## **Part 2: Conscious consumption and sustainability**

9. How important is sustainability to you?

- It's not important at all
- It's largely unimportant
- Slightly unimportant
- I am indifferent
- Slightly important
- It is largely important
- It is absolutely important

10. During your purchases in the last two months, did you buy a product or use a service in which sustainability appeared as a decision criterion?

- No

- I can not judge
- Yes

11. How much more are you willing to pay for sustainably sourced products?

- 0%
- 1-5%
- 6-10%
- 11-15%
- 16-20%
- 21-25%
- Over 25%

12. To what extent do you consider yourself a responsible consumer?

- Not at all
- Usually not
- No
- Maybe
- Mostly yes
- Yes
- Absolutely yes

13. To what extent does the existence of various sustainability certificates have an influence on your consumption?

- I don't take it into account at all during my purchase
- This is not the influencing factor during my purchase
- Indifferent for me
- It affects my purchase to a small extent
- It significantly affects my purchase

### **Part 3: Financial decision**

14. How influenceable do you consider yourself to be in making financial investment decisions?

- Not at all
- Usually not
- No
- Maybe
- Mostly yes
- Yes

- Absolutely yes

15. Diversifying my portfolio.

- It's not important at all
- It's largely unimportant
- Slightly unimportant
- I am indifferent
- Slightly important
- It is largely important
- It is absolutely important

16. For a financial product with the same risk but a higher return, I prefer the higher return

- Not at all
- Usually not
- No
- Maybe
- Mostly yes
- Yes
- Absolutely yes

17. My goal is to invest as much as possible in long-term, predictable, low-risk stocks and financial assets (blue-chip stocks, developed country government bonds etc.)

- Not at all
- Usually not
- No
- Maybe
- Mostly yes
- Yes
- Absolutely yes

18. In my investment portfolio, stocks and financial assets with higher risk represent a significant percentage (government bonds of risky developing countries, start-up investments, cryptocurrencies, etc.)

- Not at all
- Usually not
- No

- Maybe
- Mostly yes
- Yes
- Absolutely yes

19. I prefer to keep my money in a sight deposit for future opportunities

- Not at all
- Usually not
- No
- Maybe
- Mostly yes
- Yes
- Absolutely yes

20. Cryptocurrencies are the investment option with the highest return in the future, which is why I prefer to invest in cryptocurrencies.

- Not at all
- Usually not
- No
- Maybe
- Mostly yes
- Yes
- Absolutely yes

21. Do you typically manage your finances online?

- Not at all
- Usually not
- No
- Maybe
- Mostly yes
- Yes
- Absolutely yes

22. Have you ever heard of green financial products?

- Not at all
- Usually not
- No
- Maybe
- Mostly yes
- Yes
- Absolutely yes

23.Green financial products finance socially higher added value investments.

- Not at all
- Usually not
- No
- Maybe
- Mostly yes
- Yes
- Absolutely yes

24.My goal is to increase the proportion of my investments in green financial products.

- Not at all
- Usually not
- No
- Maybe
- Mostly yes
- Yes
- Absolutely yes

25.Do you think green financial products are safe?

- Not at all
- Usually not
- No
- Maybe
- Mostly yes
- Yes
- Absolutely yes

26.In the case of investments with the same risk, my decision is influenced by the sustainability criteria, not the return

- Not at all
- Usually not
- No
- Maybe
- Mostly yes
- Yes

- Absolutely yes

27. In the case of a green financial product with the same risk but with a higher return, I would rather choose the green financial product than another financial product

- Not at all
- Usually not
- No
- Maybe
- Mostly yes
- Yes
- Absolutely yes

28. Social expectations and long-term sustainable thinking can influence me to invest in green financial products.

- Not at all
- Usually not
- No
- Maybe
- Mostly yes
- Yes
- Absolutely yes

29. My family and environment can influence me to invest in green financial product

- Not at all
- Usually not
- No
- Maybe
- Mostly yes
- Yes
- Absolutely yes
